# Supplementary material for: The Prevalence and Impact of Fake News on COVID-19 Vaccination in Taiwan: Retrospective Study of Digital Media
Source: PubMed Central journal article supplement (PMC9045486; doi:10.2196/36830), 2022-04-26
Supplement: jmir_v24i4e36830_app1.pdf [file jmir_v24i4e36830_app1.pdf]

## Appendices

**Appendix1- Table 1. Meaning and English translation of search keywords.**

| <b>Keyword</b> | <b>English translation</b> | <b>Meaning as a keyword for news searches</b>              |
|----------------|----------------------------|------------------------------------------------------------|
| 破口             | Break                      | Infection control breach.                                  |
| 病例             | Confirmed case             | The COVID-19 cases.                                        |
| 放寬             | Relax                      | Ease the lockdown restrictions.                            |
| 疫              | Epidemic                   | COVID-19 pandemic.                                         |
| 隔離             | Isolation/ quarantine      | Measures to contain the coronavirus.                       |
| 確診             | Confirmed case             | The COVID-19 cases.                                        |
| 新冠             | COVID-19                   | Coronavirus disease 2019                                   |
| 新型冠狀病毒         | COVID-19                   | Coronavirus disease 2019                                   |
| 肺炎             | Pneumonia                  | Lung infection with inflammatory changes                   |
| 疾管             | Disease Control            | Chinese abbreviation for centers for disease control (CDC) |
| 疫苗             | vaccine                    | Used to provide immunity against COVID-19.                 |
| 高端             | Medigen MVC Vaccine        | One COVID-19 vaccine brand name.                           |
| 默德納            | Moderna                    | One COVID-19 vaccine brand name.                           |
| 接種             | Vaccination                | Vaccine uptake.                                            |

**Appendix1- Table 2. Digital media information. (Descending alphabetically. The order of news sources does not correspond to Figure 5.)**

| <b>Digital media</b>                               | <b>URL</b>                                                                    |
|----------------------------------------------------|-------------------------------------------------------------------------------|
| 紐約時報中文網 (The New York Times Chinese - Traditional) | <a href="https://cn.nytimes.com/">https://cn.nytimes.com/</a>                 |
| 工商時報 (Commercial Times)                            | <a href="https://ctee.com.tw/">https://ctee.com.tw/</a>                       |
| 中天電視 (CTI Television)                              | <a href="https://gotv.ctitv.com.tw/">https://gotv.ctitv.com.tw/</a>           |
| 經濟日報 (Economic Daily News)                         | <a href="https://money.udn.com/">https://money.udn.com/</a>                   |
| 公視新聞網 (Public Television)                          | <a href="https://news.pts.org.tw/">https://news.pts.org.tw/</a>               |
| <b>TVBS</b>                                        | <a href="https://news.tvbs.com.tw">https://news.tvbs.com.tw</a>               |
| 新頭殼 (Newtalk)                                      | <a href="https://newtalk.tw/">https://newtalk.tw/</a>                         |
| 蘋果日報 (Apple Daily)                                 | <a href="https://tw.appledaily.com">https://tw.appledaily.com</a>             |
| <b>Yahoo 奇摩 (Yahoo News)</b>                       | <a href="https://tw.news.yahoo.com/">https://tw.news.yahoo.com/</a>           |
| 聯合新聞網 (United Daily News)                          | <a href="https://udn.com/news/">https://udn.com/news/</a>                     |
| 中時電子報 (China Times)                                | <a href="https://www.chinatimes.com">https://www.chinatimes.com</a>           |
| 信傳媒 (CrederMedia)                                  | <a href="https://www.cmmedia.com.tw/">https://www.cmmedia.com.tw/</a>         |
| 中央社 (Central News Agency)                          | <a href="https://www.cna.com.tw/">https://www.cna.com.tw/</a>                 |
| 華視新聞網 (Chinese Television System)                  | <a href="https://www.cts.com.tw/">https://www.cts.com.tw/</a>                 |
| <b>CTWANT</b>                                      | <a href="https://www.ctwant.com/">https://www.ctwant.com/</a>                 |
| 大紀元 (The Epoch Times)                              | <a href="https://www.epochtimes.com/">https://www.epochtimes.com/</a>         |
| 年代新聞網 (Era News)                                   | <a href="https://www.era.com.tw/EraNews/">https://www.era.com.tw/EraNews/</a> |
| <b>ETtoday 新聞雲 (ETtoday News)</b>                  | <a href="https://www.ettoday.net/">https://www.ettoday.net/</a>               |
| 民視新聞 (Formosa News)                                | <a href="https://www.ftvnews.com.tw/">https://www.ftvnews.com.tw/</a>         |
| 自由時報 (The Liberty Times)                           | <a href="https://www.ltn.com.tw/">https://www.ltn.com.tw/</a>                 |
| 鏡週刊 (Mirror Media)                                 | <a href="https://www.mirrormedia.mg/">https://www.mirrormedia.mg/</a>         |
| 今日新聞 (NOW News)                                    | <a href="https://www.nownews.com/">https://www.nownews.com/</a>               |
| 民報 (Taiwan People News)                            | <a href="https://www.peoplemedia.tw/">https://www.peoplemedia.tw/</a>         |
| <b>SETN (Sanlih E-Television)</b>                  | <a href="https://www.setn.com/">https://www.setn.com/</a>                     |
| 風傳媒 (The Storm Media)                              | <a href="https://www.storm.mg/">https://www.storm.mg/</a>                     |
| 上報 (UP Media)                                      | <a href="https://www.upmedia.mg">https://www.upmedia.mg</a>                   |
